# Supplementary material
Source: PubMed Central journal article supplement (PMC5435424)
Supplement: supp_tpc.16.00735_TPC2016-00735-RAR1_Supplemental_Data.pdf [file supp_tpc.16.00735_TPC2016-00735-RAR1_Supplemental_Data.pdf]

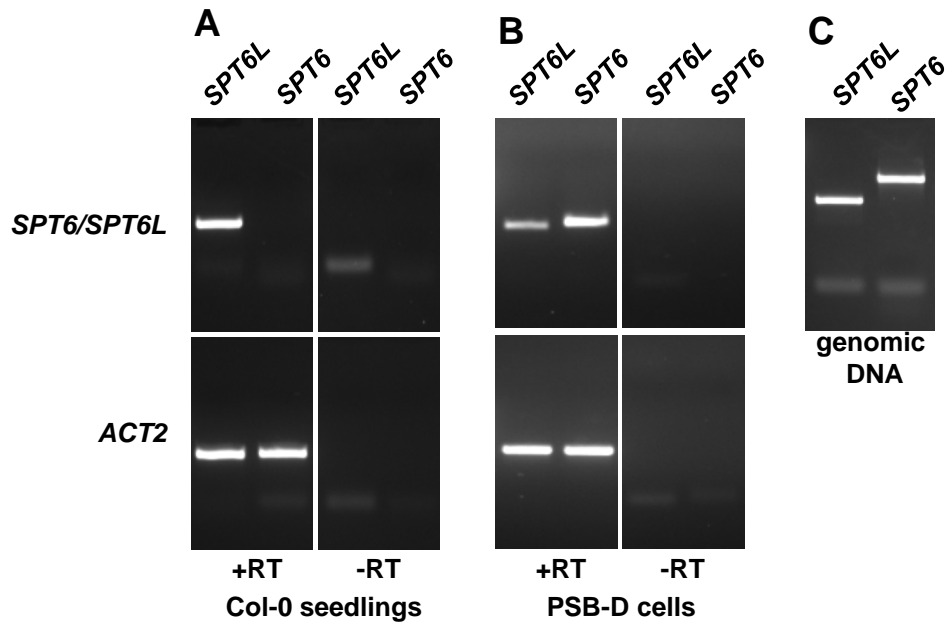

**Supplemental Figure 1.** Expression of *SPT6L* and *SPT6*. (Supports Figure 1.)

Transcript levels of *SPT6L* (At1g65440) and *SPT6* (At1g63210) were examined by RT-PCR (+RT) with RNA from 16 DAS Col-0 seedlings (**A**) and PSB-D cells (**B**). This experiment indicates that in line with publicly available microarray data (<http://www.arabidopsis.org/>) only *SPT6L* is expressed in seedlings, while the transcripts of both *SPT6* and *SPT6L* are detected in PSB-D cells. As controls the *ACT2* transcript was analysed comparatively as well as samples without reverse transcription (-RT) (right panels in **A,B**). Moreover, the functionality of the primer combinations was tested in PCR reactions using genomic DNA as a template (**C**).

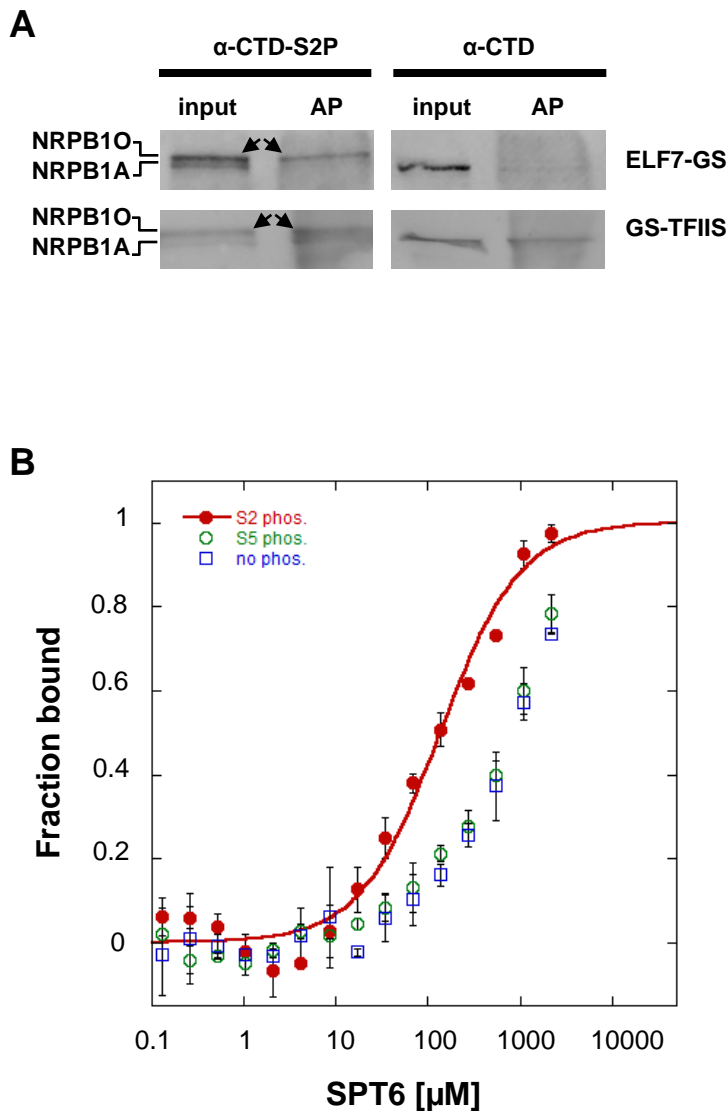

**Supplemental Figure 2.** Enrichment of Ser2-phosphorylated RNAPII in TEF affinity purifications and interaction of SPT6L with Ser2-phosphorylated RNAPII-CTD repeats. (Supports Figure 1 and 2.) (A) Immunoblot analysis of affinity purifications (AP) vs. input of ELF7-GS and GS-TFIIS with antibodies directed against Ser2-phosphorylated RNAPII-CTD (left) and against non-phosphorylated RNAPII-CTD (right). The hypophosphorylated largest subunit NRPB1A has a slightly higher electrophoretic mobility than the hyperphosphorylated NRPB1O (indicated by arrows). (B) MST analysis of the interaction of GST-SPT6L(Phe1218-Asp1412) with RNAPII-CTD repeat peptides. A constant amount of the GST-SPT6L protein was incubated with increasing concentrations of FITC-labelled CTD repeat peptides that were either non-phosphorylated (blue), or phosphorylated at Ser2 (red) or Ser5 (green). The error bars represent the standard deviation of three technical experiments (independently prepared reagent mixtures followed by MST measurements). Binding affinity ( $K_D$ ) was calculated by fitting the data points (red line) using the  $K_D$  Fit derived from the law of mass action (0 = unbound, 1= bound) SPT6 showed an affinity of  $134.8 \pm 26.6 \mu\text{M}$  ( $R^2 = 0.980$ ). For S5 and non-phosphorylated weaker binding is indicated.

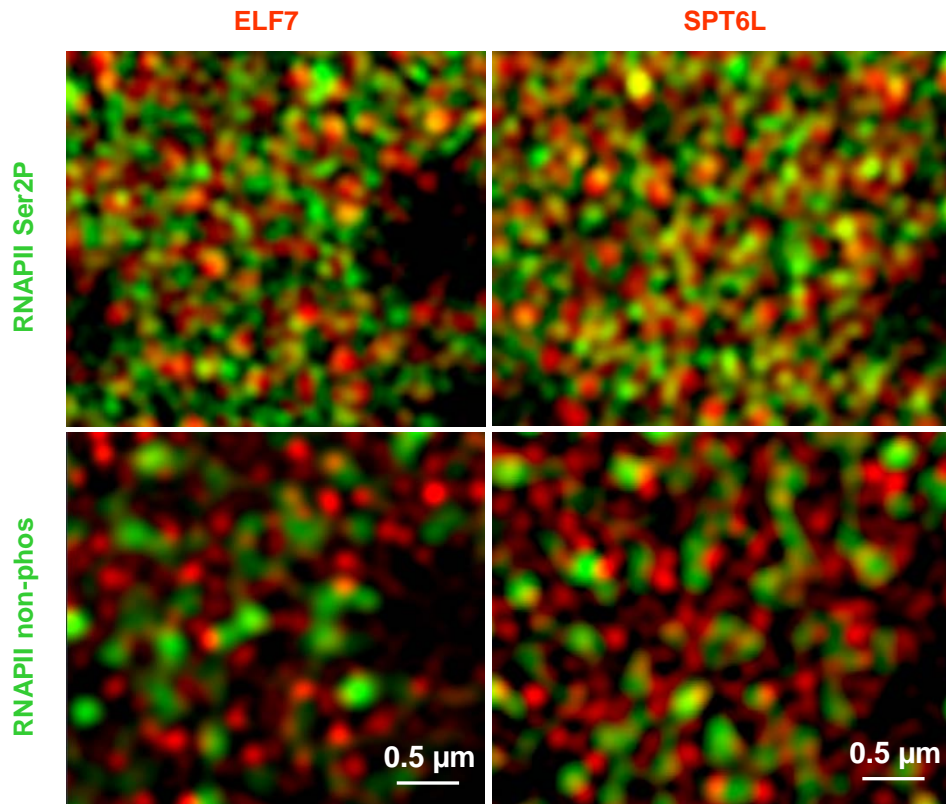

**Supplemental Figure 3.** ELF7 and SPT6L co-localise with RNAPII in euchromatin. (Supports Figure 3.) Co-localisation analysis of ELF7 and SPT6L with RNAPII-Ser2P and non-phosphorylated RNAPII within euchromatic regions of flow-sorted 8C nuclei of leaf cells visualised by SIM. For comparison, in the merges the same colour is used each for both forms of RNAPII (green) and both TEFs (ELF7, SPT6L; red). In the merge of the TEF signals with those of non-phosphorylated RNAPII more clearly red areas (representing TEFs, but no RNAPII) are visible, while in the merge with RNAPII-S2P more prominently yellow/orange areas (representing TEFs and RNAPII) are visible.

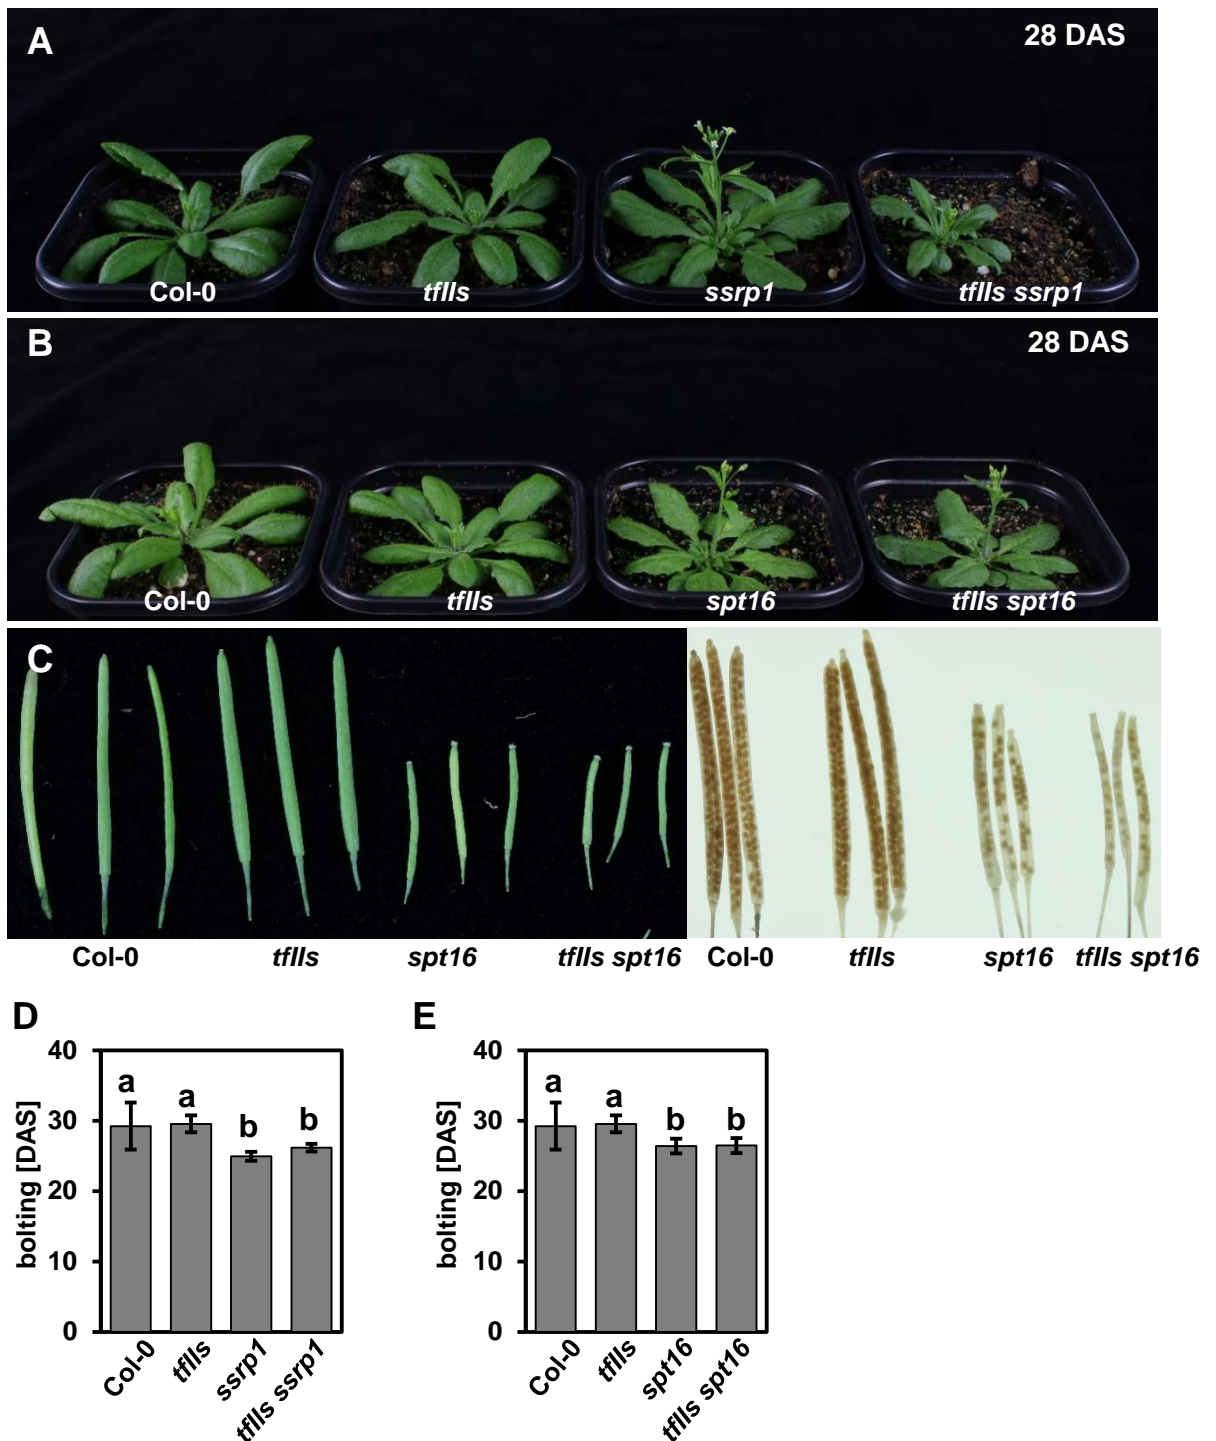

**Supplemental Figure 4.** Analysis of *tflls sssrp1* and *tflls spt16* double-mutants in comparison to the respective single-mutants and the Col-0 wild type. (Supports Figure 4.)

Representative images of the plants at 28 days after stratification (DAS) under long-day conditions are shown (A,B). Freshly harvested siliques (left) and cleared siliques (right) of *tflls spt16* and controls are shown in (C) – *tflls sssrp1* plants are sterile, producing no seeds. The time of bolting (D,E) was determined (n=13). Data were analysed by two-way ANOVA and error bars indicate standard deviation calculated from the measurements of 13 individual plants for each line. The letters above the histogram bars indicate the outcome of a multi comparisons Tukey's test ( $p < 0.05$ ).

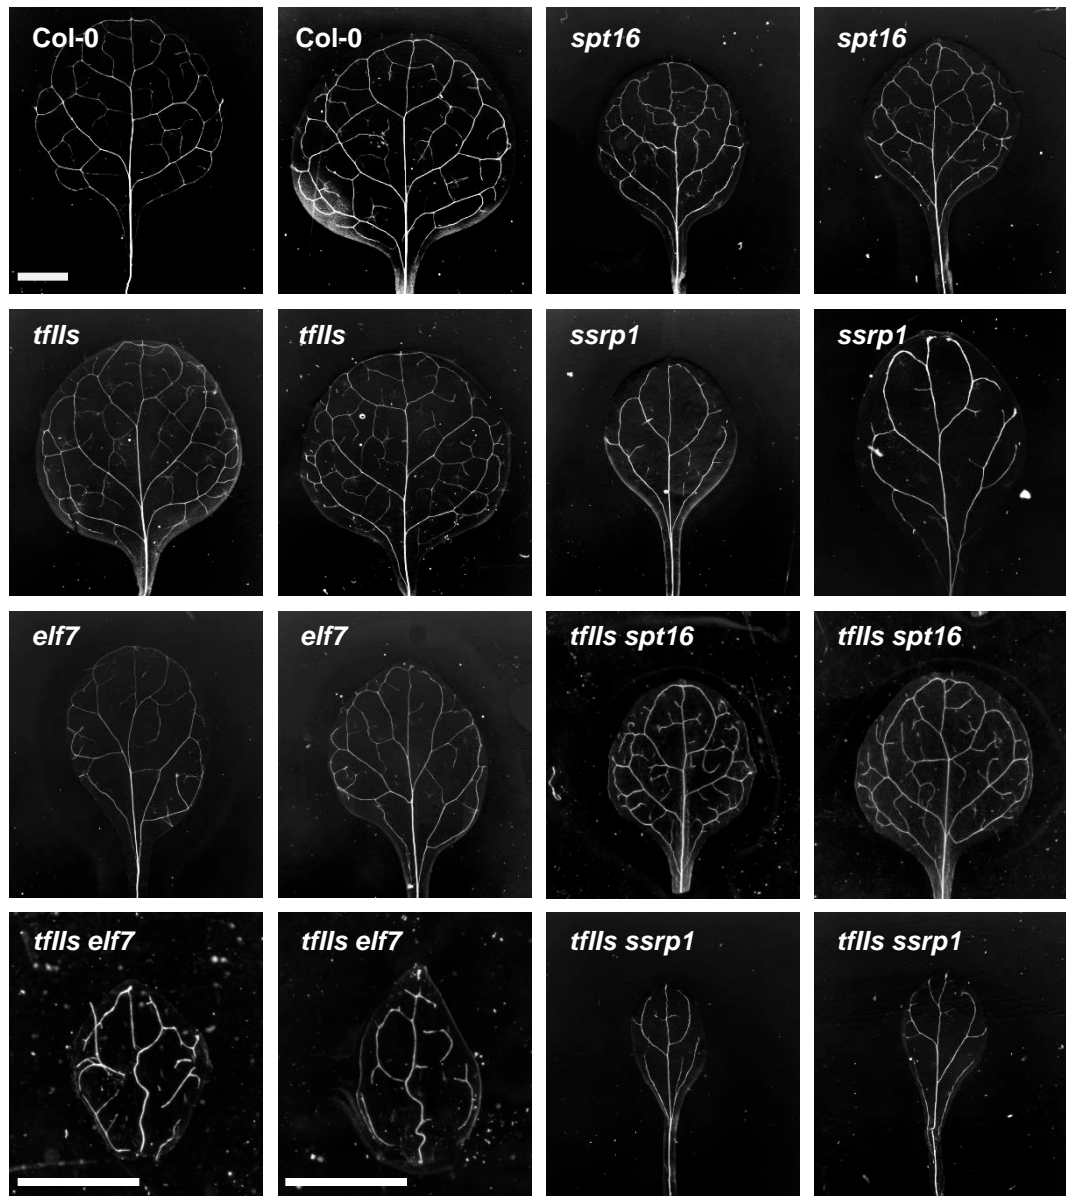

**Supplemental Figure 5.** Leaf vein patterning of Col-0, single- and double mutants. (Supports Figure 4.)

Vein pattern of cleared leaves of the indicated plant lines. Representative first leaves (left) and second leaves (right) of 21 d old plants are shown. All images are of the same magnification except for *tflls elf7*. Size bars indicate 1 mm.

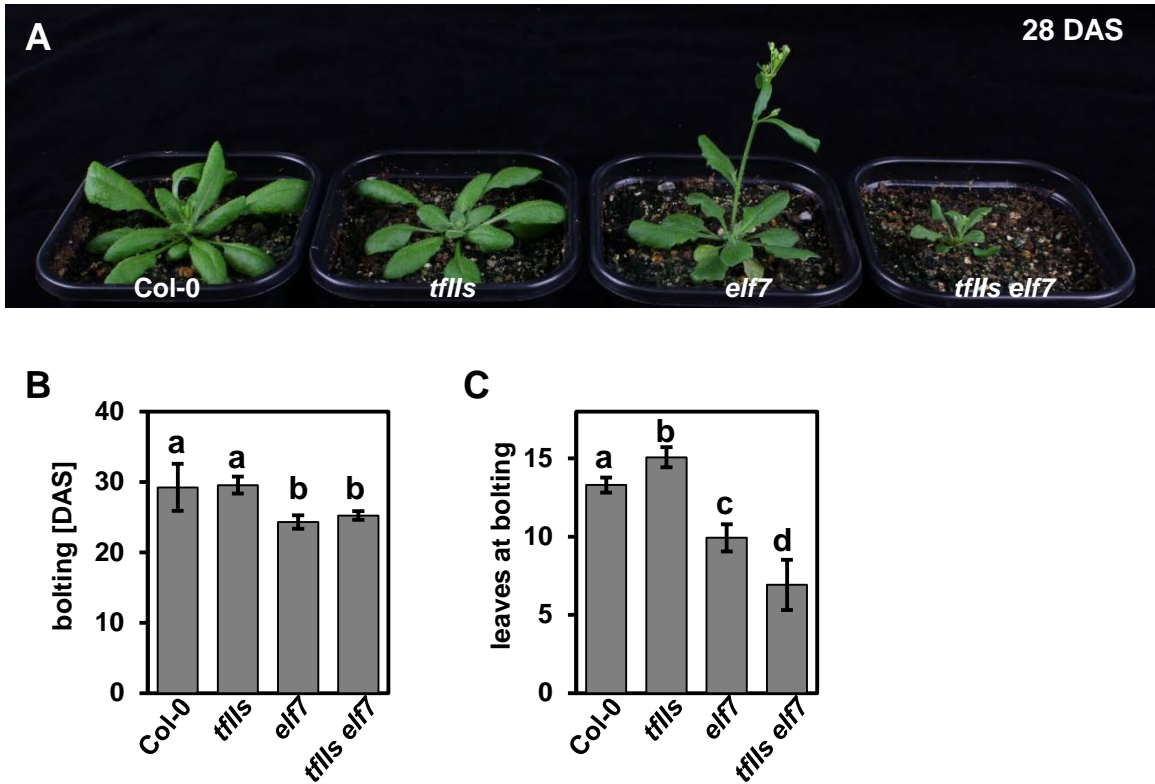

**Supplemental Figure 6.** Analysis of *tflls elf7* double-mutants in comparison to the respective single-mutants and the Col-0 wild type. (Supports Figure 4.)

Representative images of the plants at 28 days after stratification (DAS) under long-day conditions are shown (A). The time of bolting in DAS (B) and the number of leaves at bolting (C) were determined (n=13). Data were analysed by two-way ANOVA and error bars indicate standard deviation calculated from the measurements of 13 individual plants for each line. The letters above the histogram bars indicate the outcome of a multi comparisons Tukey's test ( $p < 0.05$ ).

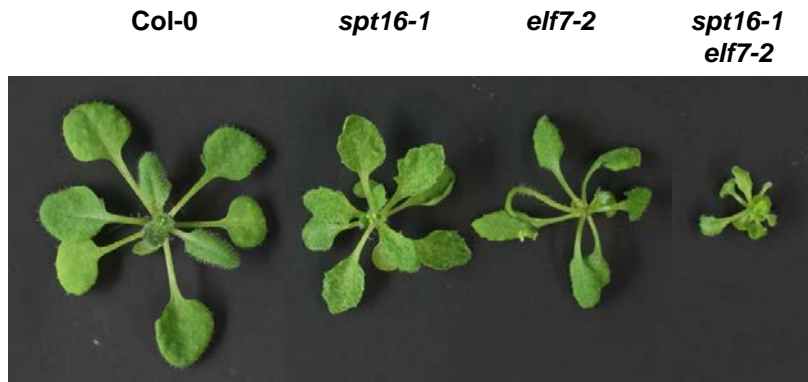

**Supplemental Figure 7.** Phenotype of *spt16 elf7* double-mutant plants in comparison to the respective single-mutants and Col-0. (Supports Figure 4.) Representative image plants at 28 days after stratification (DAS) under long-day conditions. For the cross of the *ssrp1* and *elf7* mutants, no homozygous double-mutants were obtained. The proportion of 18.4% non-germinating seeds observed with the segregating population (*ELF7*<sup>+/-</sup> *SSRP1*<sup>-/-</sup>, n = 49) indicates that this double-mutant combination is lethal.

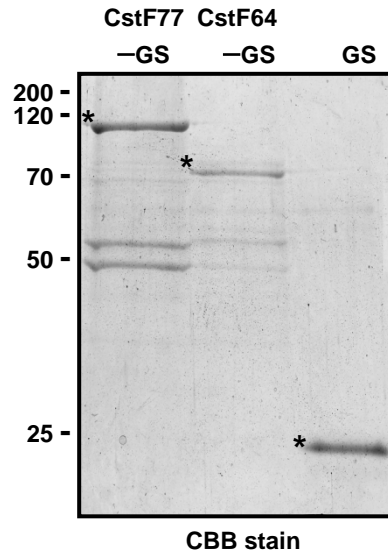

**Supplemental Figure 8.** Isolation of the CstF complex. (Supports Figure 1 and 2.)

Eluates of affinity purifications from cells expressing CstF77-GS, CstF64-GS or unfused GS after SDS-PAGE and Coomassie-staining of the gel. The unfused GS-tag and GS-fusion proteins are indicated by asterisks. The migration positions of molecular weight marker (in kDa) are indicated on the left.



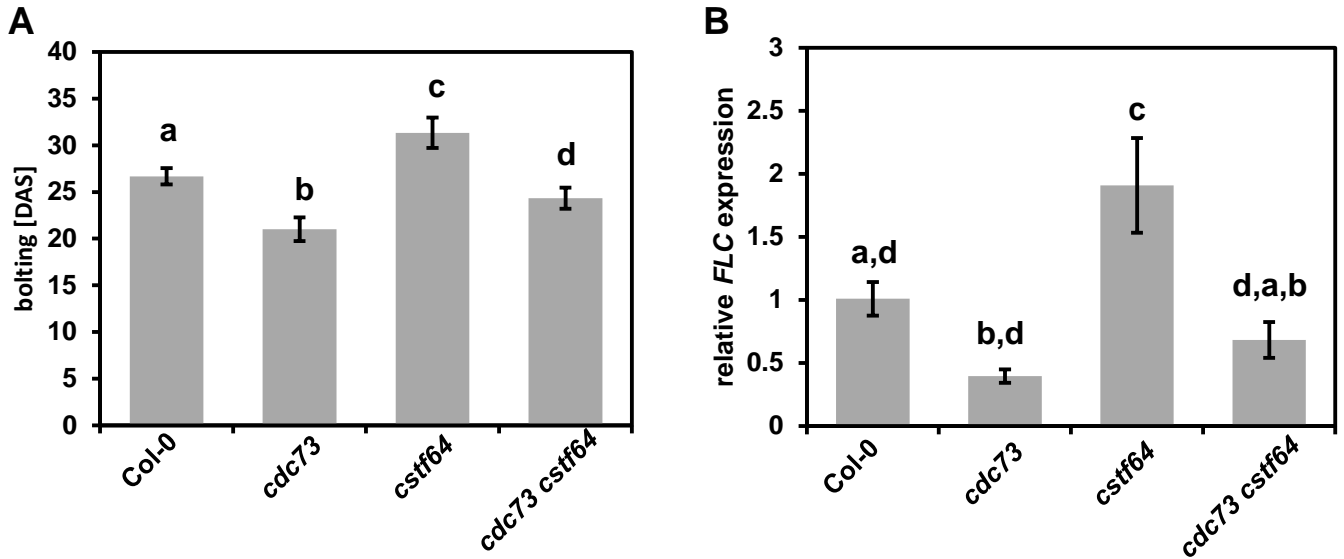

**Supplemental Figure 9.** Early bolting phenotype of *cdc73 cstf64* double-mutant plants. (Supports Figure 5.) (A) Bolting time in DAS of the indicated genotypes (n=15) under LD conditions. (B) *FLC* transcript levels of the different genotypes quantified by qRT-PCR from three biological replicates (independently pooled collections of tissues) and at least two technical replicates each. Data were analysed by two-way ANOVA and error bars indicate standard deviation. The letters above the histogram bars indicate the outcome of a multi comparisons Tukey's test ( $p < 0.05$ ), and for the bars (in B) that are indicated with more than one letter above the bar, the bars sharing the same letter are not significantly different.

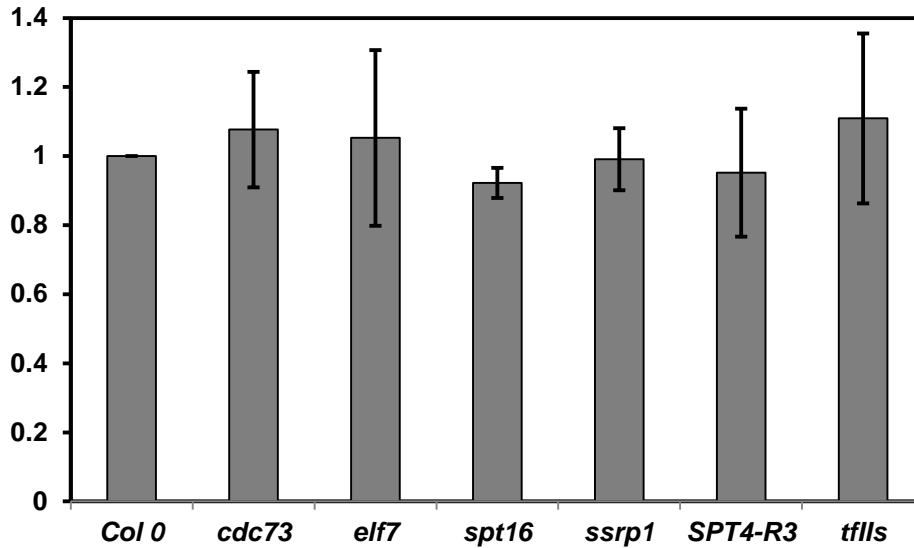

**Supplemental Figure 10.** 35S pre-rRNA levels in mutants deficient in different TEFs. (Supports Figure 6.) Quantification of RNA gel blot analyses of total RNA isolated from Col-0, the indicated T-DNA insertion mutants and SPT4-R3, which is a plant line expressing anti-sense RNA directed against *SPT4* that contains strongly reduced amounts of *SPT4-1* and *SPT4-2* transcripts (Dürr et al., 2014). The blots were hybridised with radio-labelled probes detecting the 35S pre-rRNA (ITS1) and *UBQ5*. The data depicted in the histogram represent the amount of the 35S pre-rRNA signal relative to the *UBQ5* signal (quantified using a phosphorimager) and they correspond to mean values of three experiments. Error bars represent standard deviation and analysis of the data by one-way ANOVA revealed that the datasets are not significantly different from that of Col-0.

**Supplemental Table 1.** Degree of colocalisation of ELF7 and SPT6L with RNAPII (phosphorylated at Ser2 or non-phosphorylated)

|                                               | No. nuclei | %    |                                              | No. nuclei | %    |
|-----------------------------------------------|------------|------|----------------------------------------------|------------|------|
| <b>Voxel intensities</b>                      |            |      |                                              |            |      |
| RNAPII non-phos                               | 13         | 86.0 | RNAPII non-phos                              | 13         | 94.5 |
| ELF7                                          | 13         | 64.0 | SPT6L                                        | 13         | 90.9 |
| RNAPII Ser2P                                  | 13         | 100  | RNAPII Ser2P                                 | 13         | 100  |
| <b>Co-localisation</b>                        |            |      |                                              |            |      |
| RNAPII non-phos colocalising to ELF7          | 13         | 52.1 | RNAPII non-phos colocalising to SPT6L        | 13         | 59.0 |
| ELF7 colocalising to RNAPII non-phos          | 13         | 55.5 | SPT6L colocalizing to RNAPII non-phos        | 13         | 60.0 |
| RNAPII non-phos colocalising to RNAPII Ser2P  | 13         | 53.2 | RNAPII non-phos colocalising to RNAPII Ser2P | 13         | 55.8 |
| RNAPII Ser2-P colocalising to RNAPII non-phos | 13         | 59.3 | RNAPII Ser2P colocalising to RNAPII non-phos | 13         | 60.7 |
| ELF7 colocalising to RNAPII Ser2P             | 13         | 62.8 | SPT6L colocalising to RNAPII Ser2P           | 13         | 67.2 |
| RNAPII Ser2P colocalising to ELF7             | 13         | 64.7 | RNAPII Ser2P colocalising to SPT6L           | 13         | 74.8 |

*Voxel intensities calculated by Imaris 8.0*

**Supplemental Table 2.** Overview of phenotypes observed for single- and double mutants defective in various TEFs.

| trait <sup>1</sup> \ genotype | Col-0 | <i>tflls</i> | <i>ssrp1</i> | <i>spt16</i> | <i>elf7</i> | <i>tflls</i><br><i>ssrp1</i> | <i>tflls</i><br><i>spt16</i> | <i>tflls</i><br><i>elf7</i> | <i>ssrp1</i><br><i>elf7</i> | <i>spt16</i><br><i>elf7</i> |
|-------------------------------|-------|--------------|--------------|--------------|-------------|------------------------------|------------------------------|-----------------------------|-----------------------------|-----------------------------|
| viability                     | ✓     | ✓            | ✓            | ✓            | ✓           | ✓                            | ✓                            | ✓                           | -                           | ✓                           |
| rosette ø                     | ++++  | ++++         | +++          | +++          | +++         | ++                           | +++                          | +                           | -                           | +                           |
| inflorescence No.             | +     | +            | ++           | ++           | ++          | +++                          | ++                           | ++++                        | -                           | n.d.                        |
| bolting [DAS] <sup>2</sup>    | +++   | +++          | ++           | ++           | ++          | ++                           | ++                           | ++                          | -                           | n.d.                        |
| bolting [leaves] <sup>3</sup> | +++   | ++++         | +++          | +++          | ++          | n.d.                         | n.d.                         | +                           | -                           | n.d.                        |
| leaf veins                    | ++++  | ++++         | ++           | +++          | +++         | ++                           | +++                          | +                           | -                           | n.d.                        |
| seed set                      | +++   | +++          | +            | +            | ++          | -                            | +                            | -                           | -                           | -                           |

<sup>1</sup>Quantitative differences between the different genotypes regarding the traits analysed in this report are summarised here.

<sup>2</sup>The bolting time [DAS] relative to Col-0 (+++ ) is reduced in some genotypes (++) .

<sup>3</sup>The leaf number at bolting is increased (++++ ) or reduced (++,+ ) relative to Col-0 (+++ ) in some genotypes.

**Supplemental Table 3.** Oligonucleotide primers used in this study and construction of plasmids

|                                       | use                                                    | plasmid                       | restr. site |
|---------------------------------------|--------------------------------------------------------|-------------------------------|-------------|
| AAGGATCCATGGCGGCTGCGGCTTTTGGGCA       | Insertion of <i>CDKC2</i> CDS in pCambia2300-GS        | pCambia 2300- CDKC2-GS        | BamHI       |
| GCGGAGCTCCGGTTGCCATCCATATTGTTGGT      | Insertion of <i>CDKC2</i> CDS in pCambia2300-GS        | pCambia 2300- CDKC2-GS        | SacI        |
| TATAGTCGACATGGATACGAGGTTTCCGTTTC      | Insertion of <i>NRPB1</i> CDS in pCambia2300-GS        | pCambia 2300- NRPB1-GS        | Sall        |
| CGCGTCTAGAAGGGTTGCCTTTATCATCCTTAC     | Insertion of <i>NRPB1</i> CDS in pCambia2300-GS        | pCambia 2300- NRPB1-GS        | XbaI        |
| CGGAGCTCCCTGTGCTTGCCTTTAGATGGT        | Insertion of <i>SPT16</i> CDS in pCambia2300-GS        | pCambia 2300- SPT16-GS        | SacI        |
| GCTCTAGAATGGATCCATTATCAGT             | Insertion of <i>CDC73</i> CDS in pCambia 2300-GS       | pCambia 2300-CDC73-GS         | XbaI        |
| TCCCCGGGCCAGAATGCGACCG                | Insertion of <i>CDC73</i> CDS in pCambia 2300-GS       | pCambia 2300-CDC73-GS         | SmaI        |
| GCTCTAGAATGGCTTCATCATCA               | Insertion of <i>CSTF64</i> CDS in pCambia 2300-GS      | pCambia 2300-CSTF64-GS        | XbaI        |
| TCCCCGGGCCTGAAGGCTGCATCAT             | Insertion of <i>CSTF64</i> CDS in pCambia 2300-GS      | pCambia 2300-CSTF64-GS        | SmaI        |
| GCTCTAGAATGGCTGATAAGTAC               | Insertion of <i>CSTF77</i> CDS in pCambia 2300-GS      | pCambia 2300-CSTF77-GS        | XbaI        |
| TCCCCGGGCCGCCAGTGTACCAGA              | Insertion of <i>CSTF77</i> CDS in pCambia 2300-GS      | pCambia 2300-CSTF77-GS        | SmaI        |
| GCTCTAGAATGGCGTCGTACCG                | Insertion of <i>ELF7</i> CDS in pCambia 2300-GS        | pCambia 2300-ELF7-GS          | XbaI        |
| TCCCCGGGCCTTCAGAATAATC                | Insertion of <i>ELF7</i> CDS in pCambia 2300-GS        | pCambia 2300-ELF7-GS          | SmaI        |
| GCTCTAGAATGGCAGACTCTCGGAATGGTAAT      | Insertion of <i>SPT16</i> CDS in pCambia2300-GS        | pCambia 2300-SPT16-GS         | XbaI        |
| AATTGCGGCCGCATATGGCGGACGGCCACTCC      | Insertion of <i>SSRP1</i> CDS in pCambia2300-GS        | pCambia 2300-SSRP1-GS         | NotI        |
| CGGAGCTCGTTACTATCGGAATCGTTTCCTGAGT    | Insertion of <i>SSRP1</i> CDS in pCambia2300-GS        | pCambia 2300-SSRP1-GS         | SacI        |
| TTGGGCCCAACAATGGGAAGCGCACCAGCTCAGATTC | Insertion of <i>SPT4-2</i> CDS in pCambia2300-GS       | pCambia2300-SPT4-2-GS         | SmaI        |
| TTGAGCTCTCACATGCGTTTTCGGCAGAACAT      | Insertion of <i>SPT4-2</i> CDS in pCambia2300-GS       | pCambia2300-SPT4-2-GS         | SacI        |
| AATTCTCGAGTTTGTGAAAAGCCCATCAAACCTTGG  | Insertion of <i>TFIIS</i> promoter in pGreenII0179-GS  | pGreenII0179:TFIISp::GS-TFIIS | XhoI        |
| AACTCGAGACGTTCCGACAATCCCTAGCTCA       | Insertion of <i>TFIIS</i> promoter in pGreenII0179-GS  | pGreenII0179:TFIISp::GS-TFIIS | XhoI        |
| CGGGATCCATGGAGAGTGATTTGATTGATTTG      | Insertion of <i>TFIIS</i> CDS in pGreenII0179-GS       | pGreenII0179:TFIISp::GS-TFIIS | BamHI       |
| AAGAATTCCTCAACAGAACTCCAGTGGTTG        | Insertion of <i>TFIIS</i> CDS in pGreenII0179-GS       | pGreenII0179:TFIISp::GS-TFIIS | EcoRI       |
| CGGGATCCCAAAGTCTCGGATGATT             | Insertion of <i>SPT6</i> CDS (aa1218-1412) in pGex5x-1 | pGex5x-1-SPT6_partial         | BamHI       |
| ACGCGTCGACTCAGTCATCAATATGCCT          | Insertion of <i>SPT6</i> CDS (aa1218-1412) in pGex5x-1 | pGex5x-1-SPT6_partial         | Sall        |
| CGGGATCCGATTCTGAATCTTTGGC             | Insertion of <i>ELF7</i> CDS (aa401-589) in pQE9       | pQE9-ELF7_partial             | BamHI       |
| CCCAAGCTTTCATTCAGAATAATCATC           | Insertion of <i>ELF7</i> CDS (aa401-589) in pQE9       | pQE9-ELF7_partial             | HindIII     |
| AAGGATCCCTATCACCAGCTAGCCCTAC          | Insertion of <i>NRPB1</i> CDS (aa1746-1839) in pQE9    | pQE9-NRPB1_partial            | BamHI       |
| ATATAAGCTTTCAAGGGTTGCCTTTATCATCC      | Insertion of <i>NRPB1</i> CDS (aa1746-1839) in pQE9    | pQE9-NRPB1_partial            | HindIII     |
| CGGGATCCGTATTAGATTCTGGGTTA            | Insertion of <i>SPT6</i> CDS (aa1121-1430) in pQE9     | pQE9-SPT6_partial             | BamHI       |
| ACGCGTCGACCTACATCGGTACCTTGGCAGC       | Insertion of <i>SPT6</i> CDS (aa1121-1430) in pQE9     | pQE9-SPT6_partial             | Sall        |
| ATGGATCCATGGAGAGTGATTTGATTGATT        | Insertion of <i>TFIIS</i> CDS in pQE9                  | pQE9-TFIIS                    | BamHI       |
| ATATCTGCAGTCAACAGAACTTCCAGTGGT        | Insertion of <i>TFIIS</i> CDS in pQE9                  | pQE9-TFIIS                    | PstI        |
| AGCCAAGAAGACCGAACTCA                  | qRT-PCR <i>FLC</i>                                     |                               |             |
| TTTGTCCAGCAGGTGACATC                  | qRT-PCR <i>FLC</i>                                     |                               |             |
| GTTGTAACAAGATGGATGCCA                 | qRT-PCR <i>EF1</i>                                     |                               |             |

|                                 |                                                           |  |  |
|---------------------------------|-----------------------------------------------------------|--|--|
| GGACAAATGGGATTTTGTGACG          | qRT-PCR <i>EF1</i>                                        |  |  |
| GTGGAAGAGCTGCCGTTGAATT          | qRT-PCR <i>SPT6</i>                                       |  |  |
| GCACAATCCTCCCTTCACCAAT          | qRT-PCR <i>SPT6</i>                                       |  |  |
| GTTGTTGGGGACCTGGGAAG            | qRT-PCR <i>SPT6L</i>                                      |  |  |
| ATCCATCCCATGTCCGACATC           | qRT-PCR <i>SPT6L</i>                                      |  |  |
| GCTGGAATCCACGAGACAAC            | qRT-PCR Actin 2                                           |  |  |
| AAGCCTTTGATCTTGAGAGCTT          | qRT-PCR Actin 2                                           |  |  |
| GGTAACATTGTGCTCAGTGGTGG         | ChIP qPCR, Actin2                                         |  |  |
| GGTGCAACGACCTTAATCTTCAT         | ChIP qPCR, Actin2                                         |  |  |
| AGATGGTTTTCGGGGAGGAAAATCAC      | ChIP qPCR, At3g02260                                      |  |  |
| GCTTCTCTTCGACAGGCCAGAG          | ChIP qPCR, At3g02260                                      |  |  |
| GGATGCGATCATACCAGCACTAATG       | ChIP qPCR, 18S rDNA -1                                    |  |  |
| GAGGGATGCAACACGAGGACTTC         | ChIP qPCR, 18S rDNA-1                                     |  |  |
| CGGGGGCATTTCGTATTTTCATAGTCA     | ChIP qPCR, 18S rDNA-2                                     |  |  |
| GACTAGGACGGTATCTGATCGTCTTC      | ChIP qPCR, 18S rDNA-2                                     |  |  |
| TAGGGTTCTTAGTTGATCTTGATTGAGCTC  | ChIP qPCR, TA3                                            |  |  |
| TTTGCTCTCAAACCTCTCAATTGAAGTTT   | ChIP qPCR, TA3                                            |  |  |
| TTTCGAGACGGCGACACCAATG          | ChIP qPCR, U6-1                                           |  |  |
| GAGAGTAGCTGATCCTAAATGCTATC      | ChIP qPCR, U6-1                                           |  |  |
| AAACGATGCGTTGGGATAGGTC          | ChIP qPCR, TA2                                            |  |  |
| ATACTCTCCACTTCCCCTTTTTCTTTTTA   | ChIP qPCR, TA2                                            |  |  |
| ACTGGCTCATCGTTCTCCATT           | ChIP qPCR, 7SL-1                                          |  |  |
| ATTTGTTTTGATTGCTCGGTTT          | ChIP qPCR, 7SL-1                                          |  |  |
| ACTTTCCATTTCGGAGTTTTTGT         | ChIP qPCR, U6-26                                          |  |  |
| GCCTGCTTCTCTTTTCAGATT           | ChIP qPCR, U6-26                                          |  |  |
| CGA CCC TCC CCT AAA TCA CTC CA  | ChIP qPCR, 3'ETS                                          |  |  |
| ACT TGG CGA GGT CCG GAA TCT TAC | ChIP qPCR, 3'ETS                                          |  |  |
| GAAGGCGAAGATCCAAGACAAGGAA       | ChIP qPCR, UBQ5                                           |  |  |
| GGAGGACGAGATGAAGCGTTCGA         | ChIP qPCR, UBQ5                                           |  |  |
| ATCGACGACGAATACGAAAG            | Expression of <i>CSTF64</i> (SALK_088877)                 |  |  |
| CTAAGTTGTTCTCGGTCCG             | Expression of <i>CSTF64</i> (SALK_088877)                 |  |  |
| TCGTTTCCTGAAGACGGACC            | Expression of <i>CSTF77</i> (SALK_104082)                 |  |  |
| CAAAGCTCTCTTGCCAAAG             | Expression of <i>CSTF77</i> (SALK_104082)                 |  |  |
| GCTCTAGAATGGATCCATTATCAGT       | Expression of <i>CDC73</i> (SALK_008357)                  |  |  |
| TTGTTCTGCTTCTGACTCTG            | Expression of <i>CDC73</i> (SALK_008357)                  |  |  |
| ATCGACGACGAATACGAAAG            | Genotyping, T-DNA insertion <i>cstf64-3</i> (SALK_088877) |  |  |
| CTAAGTTGTTCTCGGTCCG             | Genotyping, T-DNA insertion <i>cstf64-3</i> (SALK_088877) |  |  |
| TCGTTTCCTGAAGACGGACC            | Genotyping, T-DNA insertion <i>cstf77-2</i> (SALK_104082) |  |  |
| CAAAGCTCTCTTGCCAAAG             | Genotyping, T-DNA insertion <i>cstf77-2</i> (SALK_104082) |  |  |

|                                    |                                                                            |  |  |
|------------------------------------|----------------------------------------------------------------------------|--|--|
| GCTCTAGAATGGATCCATTATCAGT          | Genotyping, T-DNA insertion <i>cdc73-2</i> (SALK_008357)                   |  |  |
| TTCGTTCTGCTTCTGACTCTG              | Genotyping, T-DNA insertion <i>cdc73-2</i> (SALK_008357)                   |  |  |
| ATCCTCTGGAATGTTGATAGT              | Genotyping, T-DNA insertion <i>tflls-1</i> (SALK_056755)                   |  |  |
| TTTCCTCTTGTCACCTTGCCAT             | Genotyping, T-DNA insertion <i>tflls-1</i> (SALK_056755)                   |  |  |
| ATTTTGCCGATTTTCGGAAC               | Genotyping, T-DNA insertion SALK LBb1.3 ( <i>tflls-1</i> )                 |  |  |
| CCCTCATCTTACGCGTATCAGA             | Genotyping, T-DNA insertion <i>ssrp1-2</i> (SALK_001283)                   |  |  |
| AATTAAGCTTAGTTACTATCGGAATCGTTTCCT  | Genotyping, T-DNA insertion <i>ssrp1-2</i> (SALK_001283)                   |  |  |
| CTATCTCTGCATTGCCTCTTAGC            | Genotyping, T-DNA insertion <i>spt16-1</i> (SAIL_392_G06)                  |  |  |
| TACTTGTCTAACGCAGCGAAATC            | Genotyping, T-DNA insertion <i>spt16-1</i> (SAIL_392_G06)                  |  |  |
| GCCTTTTCAGAAATGGATAAATAGCCTTGCTTCC | Genotyping, T-DNA insertion SAIL LB ( <i>SPT16</i> )                       |  |  |
| TTGGACCCTTCAATTCGTGATG             | Genotyping, T-DNA insertion <i>elf7-2/-3</i> (SALK_046605/_019433)         |  |  |
| CCTGGCCCTTTTCTTCCTCA               | Genotyping, T-DNA insertion <i>elf7-2/-3</i> (SALK_046605/_019433)         |  |  |
| GTTGCCCGTCTCACTGGTGA               | Genotyping, T-DNA insertion SALK LBb1.3 ( <i>elf7-2, elf7-3, ssrp1-2</i> ) |  |  |
| TCGATACCTGTCCAAAACAG               | RNA gel blot probe for pre-rRNA <i>ITS1</i>                                |  |  |
| AGACTTCAGTTCGCAGC                  | RNA gel blot probe for pre-rRNA <i>ITS1</i>                                |  |  |
| CTCACACGAATAAGGTACAAAGTTC          | RNA gel blot probe <i>FLC</i> antisense                                    |  |  |
| GAAGGCGAAGATCCAAGACAAGGAA          | RNA gel blot probe for <i>UBQ5</i>                                         |  |  |
| GGAGGACGAGATGAAGCGTCGA             | RNA gel blot probe for <i>UBQ5</i>                                         |  |  |
